# Supplementary material for: Characterizing abnormal behavior in a large population of zoo-housed chimpanzees: prevalence and potential influencing factors
Source: PeerJ. 2016 Jul 13;4:e2225. doi: 10.7717/peerj.2225 (PMC4950552; doi:10.7717/peerj.2225)
Supplement: Supplemental Information 1 [file peerj-04-2225-s001.xlsx]

## Sheet: Sheet1
Institution	Sex	Origin	Rearing	Abnormal Behavior Exhibited in the Past 2 Years
				Coprophagy	Hair Pluck	Rocking	R and R	SIB	Pacing	Other
1	F	wild	MOM	0	0	0	0	0	0	0
1	F	wild	MOM	1	0	0	0	0	0	0
1	F	wild	MOM	1	0	0	0	1	0	0
1	F	zoo	MOM	0	0	0	0	0	0	0
1	F	zoo	MOM	0	0	0	0	0	0	0
1	M	zoo	MOM	0	1	0	0	0	0	0
1	M	zoo	MOM	0	1	0	0	0	0	0
1	F	zoo	MOM	1	1	0	0	0	0	0
1	F	zoo	MOM	1	1	0	0	0	0	0
1	M	lab	NON	0	0	0	0	0	0	0
1	F	lab	NON	1	1	0	0	0	0	0
1	M	priv	NON	0	0	1	0	0	0	0
1	F	zoo	NON	0	0	0	0	0	0	1
1	F	zoo	NON	0	0	0	0	0	0	1
2	F	lab	MOM	1	1	0	1	0	0	1
2	F	zoo	MOM	1	1	0	0	0	0	0
2	F	zoo	MOM	1	1	0	0	0	0	0
2	F	lab	NON	1	1	0	0	0	0	0
2	F	lab	NON	1	1	0	0	0	0	1
2	F	lab	NON	1	1	1	0	0	0	0
2	M	priv	NON	1	1	0	0	0	0	0
2	M	priv	NON	1	1	0	0	0	0	0
2	F	zoo	NON	1	1	0	0	0	0	0
2	F	zoo	NON	1	1	0	0	0	0	0
2	M	zoo	NON	1	1	0	1	0	0	0
3	F	wild	MOM	1	0	0	0	0	0	0
3	F	zoo	MOM	0	0	0	0	0	0	0
3	F	zoo	MOM	0	0	0	0	0	0	0
3	F	zoo	MOM	0	0	0	0	0	0	0
3	F	zoo	MOM	1	0	0	0	0	0	0
4	F	wild	MOM	1	0	0	0	0	0	0
4	F	zoo	MOM	1	0	0	0	0	0	0
4	M	zoo	MOM	1	0	0	0	0	0	0
5	M	zoo	MOM	1	0	0	0	0	0	0
5	F	zoo	MOM	1	0	0	0	0	0	0
5	F	zoo	MOM	1	0	0	0	0	0	0
6	M	wild	MOM	0	1	0	0	0	0	0
6	F	wild	MOM	0	1	0	0	0	0	0
6	M	zoo	MOM	1	0	0	0	0	0	0
6	F	zoo	MOM	1	0	0	0	0	0	0
6	F	zoo	MOM	1	1	0	0	0	0	0
6	F	zoo	MOM	1	0	0	1	0	0	0
6	F	zoo	MOM	1	1	0	0	0	0	0
6	F	zoo	MOM	1	1	0	0	0	0	0
6	M	zoo	MOM	1	0	0	0	0	0	1
6	F	lab	NON	0	1	0	0	0	0	0
6	F	zoo	NON	0	1	0	0	0	0	0
7	F	wild	MOM	0	0	0	0	0	0	0
7	M	wild	MOM	1	0	0	0	0	0	1
7	M	zoo	MOM	0	0	0	0	0	0	0
7	F	zoo	MOM	1	0	0	0	0	0	0
7	M	zoo	MOM	0	0	0	1	0	0	0
7	F	zoo	MOM	1	0	0	1	0	0	0
7	M	zoo	NON	0	0	1	0	0	0	0
7	F	zoo	NON	1	1	0	0	0	0	1
8	F	wild	MOM	0	0	0	0	0	0	0
8	M	wild	MOM	0	0	0	0	0	0	0
8	F	zoo	MOM	0	0	0	0	0	0	0
8	M	zoo	MOM	0	0	0	0	0	0	0
8	M	zoo	MOM	0	0	0	0	0	0	0
8	M	zoo	MOM	0	0	0	0	0	0	0
8	M	zoo	MOM	0	0	0	0	0	0	0
8	F	zoo	NON	0	0	0	0	0	0	0
9	M	wild	MOM	0	0	0	0	0	0	0
9	M	wild	MOM	0	1	0	0	0	0	0
9	M	priv	NON	0	0	0	0	0	0	0
9	M	priv	NON	0	0	0	0	0	0	0
9	M	priv	NON	0	0	0	0	0	0	0
9	F	priv	NON	1	1	0	0	0	0	0
9	F	priv	NON	1	1	0	0	0	0	0
9	F	priv	NON	0	1	0	0	0	0	1
9	F	priv	NON	1	1	0	1	0	0	0
10	F	wild	MOM	1	1	0	0	0	0	0
10	F	zoo	MOM	1	0	0	0	0	0	0
10	F	zoo	MOM	1	1	0	1	0	0	0
10	M	zoo	NON	1	0	0	0	0	0	0
10	F	zoo	NON	1	1	0	1	0	0	0
10	M	zoo	NON	1	1	1	0	0	0	1
11	F	wild	MOM	0	0	0	0	0	0	0
11	F	wild	MOM	1	0	0	0	0	0	0
11	F	zoo	MOM	0	0	0	0	0	0	0
11	M	zoo	MOM	0	0	0	0	0	0	0
11	F	zoo	MOM	0	0	0	0	0	0	0
11	F	priv	NON	0	0	0	0	0	0	0
11	F	zoo	NON	0	0	0	0	0	1	0
11	F	zoo	NON	0	0	0	0	0	1	0
11	F	zoo	NON	1	0	0	1	0	1	0
12	F	wild	MOM	1	1	0	0	0	0	0
12	M	zoo	MOM	0	0	1	0	0	0	0
12	F	priv	NON	0	0	0	0	0	0	0
12	F	zoo	NON	0	0	0	0	0	0	0
12	F	zoo	NON	0	0	0	0	0	0	0
12	M	zoo	NON	0	0	0	0	0	0	0
13	F	wild	MOM	0	0	0	0	0	0	0
13	M	zoo	MOM	0	0	0	0	0	0	0
13	M	zoo	MOM	0	1	0	0	0	0	0
13	M	priv	NON	0	0	0	0	0	0	0
13	M	zoo	NON	0	1	0	0	0	0	0
14	M	zoo	MOM	0	0	0	0	0	0	0
14	M	zoo	MOM	0	0	0	0	0	0	0
14	F	zoo	MOM	0	0	0	0	0	0	0
14	F	zoo	MOM	0	0	0	0	0	0	0
14	F	zoo	MOM	1	0	0	0	0	0	0
14	F	zoo	MOM	1	0	0	0	0	0	0
14	F	zoo	MOM	1	0	0	0	0	0	0
14	F	zoo	MOM	1	0	0	0	0	0	0
14	F	zoo	MOM	0	0	1	0	0	0	0
14	M	zoo	MOM	0	1	0	0	0	0	0
14	M	zoo	MOM	0	1	0	0	0	0	0
14	M	zoo	MOM	0	1	0	0	0	0	0
14	M	zoo	NON	0	0	0	0	0	0	0
14	F	zoo	NON	1	0	0	0	0	0	0
14	F	zoo	NON	0	0	1	0	0	0	0
14	F	zoo	NON	0	0	1	0	0	0	0
15	M	zoo	MOM	1	0	0	0	0	0	0
15	F	zoo	NON	0	0	0	0	0	0	1
16	F	wild	MOM	0	0	0	0	0	0	0
16	F	wild	MOM	0	1	0	0	0	0	0
16	F	zoo	MOM	0	0	0	0	0	0	0
16	M	zoo	MOM	0	0	0	0	0	0	0
16	M	zoo	MOM	0	0	0	0	0	0	0
16	M	zoo	MOM	0	1	0	0	0	0	0
17	F	lab	NON	0	0	1	0	0	0	0
17	F	lab	NON	0	1	0	0	0	0	0
17	F	lab	NON	0	0	1	0	0	1	0
17	M	lab	NON	1	0	0	0	0	0	1
17	M	priv	NON	0	0	0	0	0	0	0
17	M	priv	NON	0	0	0	0	0	0	1
18	M	wild	MOM	0	0	0	0	0	0	0
18	F	zoo	NON	0	0	0	0	0	0	0
18	F	zoo	NON	0	0	0	0	0	0	1
19	F	lab	MOM	0	0	0	0	0	0	0
19	F	lab	NON	1	1	0	0	0	0	0
20	M	lab	MOM	1	1	0	0	1	0	1
20	F	lab	NON	1	1	0	0	0	0	0
21	M	wild	MOM	0	0	0	0	0	0	0
21	M	zoo	MOM	0	0	0	0	0	0	0
21	M	zoo	MOM	0	0	0	0	0	0	0
21	F	zoo	MOM	1	0	0	0	0	0	0
21	F	zoo	MOM	1	0	0	0	0	0	0
22	M	wild	MOM	0	0	0	1	0	0	0
22	F	wild	MOM	1	1	0	0	0	0	0
22	F	wild	MOM	1	0	0	0	0	0	1
23	M	wild	MOM	0	1	0	0	0	0	0
23	F	wild	MOM	0	1	0	0	0	0	0
23	M	zoo	NON	0	1	1	0	0	0	0
24	F	wild	MOM	0	0	0	0	0	0	0
24	F	wild	MOM	0	0	0	0	0	0	0
24	F	zoo	MOM	0	0	0	0	0	0	0
24	F	zoo	MOM	0	1	0	0	0	0	0
24	M	zoo	NON	0	0	0	0	0	0	0
24	F	zoo	NON	0	0	0	0	0	0	0
24	F	zoo	NON	0	1	0	0	0	0	0
25	F	wild	MOM	1	0	0	0	0	0	0
25	F	wild	MOM	1	0	0	0	0	0	0
25	M	zoo	MOM	1	1	0	0	0	0	0
25	F	zoo	MOM	1	1	0	0	0	0	0
25	F	zoo	MOM	1	0	0	1	0	0	0
25	M	zoo	MOM	1	0	0	1	0	0	0
26	F	wild	MOM	0	0	0	0	0	0	0
26	F	wild	MOM	0	0	0	0	0	0	0
26	M	wild	MOM	0	0	0	0	0	0	0
26	M	zoo	MOM	0	0	0	0	0	0	0
26	F	zoo	MOM	0	0	0	0	0	0	0
26	M	zoo	NON	0	0	0	0	0	0	0
			Total	67	53	11	12	2	4	15
			Percentage	0.406061	0.321212	0.0666667	0.0727273	0.0121212	0.0242424	0.0909091
